# Supplementary material for: Secure Green-Oriented Multiuser Scheduling for Wireless-Powered Internet of Things
Source: Hindawi journal article supplement (doi:10.1155/2020/7845107), 2020-01-07
Supplement: f1 [file 7845107.f1.zip]

# README

Here are some helpful instructions on simulation programs and settings.

First of all, the M file in the folder “code”, which named WPCCN6\_SEE\_gammaB, is the main program. Based on the main program, by changing the different performance indicators, i.e., SOP or SEE required, the Fig. 3 and Fig. 4 in our manuscript can be derived. Meanwhile, other M files in the folder “code” are the callable programs. On the other hand, the files named “WPCCN\_fig0.fig” and “WPCCN\_fig1.fig” in the folder “code” are the numerical results of the simulation experiment, which had been given in our paper, i.e., Fig. 3 and Fig.4.

Then, the folder “additional material” provides the PDF format files of all the simulation results in our paper, i.e., Fig0\_SOP\_gammaB. pdf, Fig1\_SEE\_gammaB. pdf, Fig2\_SEE\_dBS. pdf, Fig3\_SEE\_dSD. pdf, and Fig4\_SEE\_alpha. pdf. These results can be obtained separately by using the main program.

Finally, it is worth noting that all the numerical results in our paper come from the simulation environment of MATLAB, which all are true experimental results. The specific experimental parameters are given as Section V. Combining the parameter setting in the article with the program code, all the results can be reproduced.

All program codes in the folder “code” are our original, which are refused to forward to others. If anyone has any questions, please contact us via email. The mailbox address is shangxiaohui1214@126.com.
