# Supplementary material for: Secure Green-Oriented Multiuser Scheduling for Wireless-Powered Internet of Things
Source: Hindawi journal article supplement (doi:10.1155/2020/7845107), 2020-01-07
Supplement: f1 [file 7845107.f1.zip]

Archive with 29 entries (26 files):
- 7845107.f1/Additional material/
- 7845107.f1/Additional material/Fig0_SOP_gammaB.pdf
- 7845107.f1/Additional material/Fig1_SEE_gammaB.pdf
- 7845107.f1/Additional material/Fig2_SEE_dBS.pdf
- 7845107.f1/Additional material/Fig3_SEE_dSD.pdf
- 7845107.f1/Additional material/Fig4_SEE_alpha.pdf
- 7845107.f1/Code/
- 7845107.f1/Code/dB0.m
- 7845107.f1/Code/SEE_function1.m
- 7845107.f1/Code/SEE_search.m
- 7845107.f1/Code/SEE_search_function.m
- 7845107.f1/Code/SEE_search_function0.m
- 7845107.f1/Code/SEE_search0.m
- 7845107.f1/Code/SEE_simulation_function.m
- 7845107.f1/Code/SEE_simulation_function0.m
- 7845107.f1/Code/SEE_simulation_function2.m
- 7845107.f1/Code/SEE_simulation_function20.m
- 7845107.f1/Code/SEE_simulation_function3.m
- 7845107.f1/Code/SEE_simulation_function30.m
- 7845107.f1/Code/SEE_theory_function.m
- 7845107.f1/Code/SEE_theory_function0.m
- 7845107.f1/Code/SEE_theory_function2.m
- 7845107.f1/Code/SEE_theory_function20.m
- 7845107.f1/Code/SOP_function1.m
- 7845107.f1/Code/WPCCN_fig0.fig
- 7845107.f1/Code/WPCCN_fig1.fig
- 7845107.f1/Code/WPCCN6_SEE_gammaB.m
- 7845107.f1/ReadMe/
- 7845107.f1/ReadMe/README.pdf
