# Supplementary material for: Secure Green-Oriented Multiuser Scheduling for Wireless-Powered Internet of Things
Source: Hindawi journal article supplement (doi:10.1155/2020/7845107), 2020-01-07
Supplement: f1 [file 7845107.f1.zip › 7845107.f1/Code/dB0.m]

function [ y ] = dB0( x )


y=10^(x/10);


end
