# Supplementary material for: Secure Green-Oriented Multiuser Scheduling for Wireless-Powered Internet of Things
Source: Hindawi journal article supplement (doi:10.1155/2020/7845107), 2020-01-07
Supplement: f1 [file 7845107.f1.zip › 7845107.f1/Code/SEE_function1.m]

function [ SEE_theory1 ] = SEE_function1(gammaBdB,gammaEdB,gammathdB,alpha,N,K,Rth,eta)


NdBm=-30;    %N00=-174dB/Hz ÔëÉù¹¦ÂÊÆ×ÃÜ¶È   
NdBm0=10^(NdBm/10);
Pc=112.4*10^(-3);  %¹Ì¶¨ËðºÄ¹¦ÂÊ


%ÐÅµÀ²ÎÊý
lambdaSR=10;
lambdaRD=10;

lambdaBS=1;
lambdaBR=1;

lambdaSE=10;
lambdaRE=10;

%ÐÅÔë±ÈµÄ²ÎÊýÉèÖÃ

gammaEdB0=dB0(gammaEdB);

gammaBdB0=dB0(gammaBdB);

gammathdB0=dB0(gammathdB);


%Scheme1
variable_temp1_1=zeros(1,N);
variable_temp1_2=zeros(1,K);


    beta=2^(2*Rth/(1-alpha));
    xi=2*eta*alpha/(1-alpha); 
    fai= (1-alpha)*gammathdB0/(2*alpha*eta*gammaBdB0);    %   ÃÅÏÞ²ÎÊý       
    
   
 
     %  SOPÀíÂÛÖµ
        for k=1:K
            for m=1:N
            variable_temp1_1(m)= ...
                          nchoosek(K,k)* nchoosek(N,m)*(-1)^(k+m) ...
                          *  4*(beta-1)*gammaBdB0*lambdaSE*lambdaRE*sqrt(m*k*lambdaBS*lambdaBR*lambdaSR*lambdaRD)...
                          /  (xi * (gammaBdB0*lambdaSE+k*beta*gammaEdB0*lambdaSR)*(gammaBdB0*lambdaRE+beta*gammaEdB0*lambdaRD))...
                          * besselk( 1,    2 * sqrt(  lambdaBR*lambdaRD*(beta-1) /(gammaBdB0*xi) ) )...
                          * besselk( 1,    2*  sqrt(  m*k*lambdaSR*lambdaBS*(beta-1)/(gammaBdB0*xi)  )   );
            end
                 variable_temp1_2(k)=sum(variable_temp1_1);
        end
        
        SOP_theory1=   1-sum(variable_temp1_2);


     %  EOPÀíÂÛÖµ
        EOP_theory1= 1-   ( 1- (1-exp(-lambdaBS*fai))^N  ) *   exp(-lambdaBR*fai);
        
     %  PoutÀíÂÛÖµ
     Pout_theory1=EOP_theory1+(1-EOP_theory1)*SOP_theory1;  
     
     %  SEEÀíÂÛÖµ
     SEE_theory1=Rth*(1-Pout_theory1)/(gammaBdB0*NdBm0+Pc);


end
