# Supplementary material for: Secure Green-Oriented Multiuser Scheduling for Wireless-Powered Internet of Things
Source: Hindawi journal article supplement (doi:10.1155/2020/7845107), 2020-01-07
Supplement: f1 [file 7845107.f1.zip › 7845107.f1/Code/SEE_search.m]

function [gammaBdB_optimal, dBS_optimal, SEE_optimal]=SEE_search(alpha,N)

gammaUdB=0:0.5:45;
dBS_input=0:0.05:3;
SEE_temp=zeros(length(gammaUdB),length(dBS_input));

for i=1:length(gammaUdB)
    for j=1:length(dBS_input)
        SEE_temp(i,j)=SEE_search_function( gammaUdB(i),dBS_input(j),alpha,N );
    end
end


SEE_optimal=max(max(SEE_temp));
[x,y]=find(SEE_temp==SEE_optimal);
gammaBdB_optimal=gammaUdB(x);
dBS_optimal=dBS_input(y);

end
