# Supplementary material for: Secure Green-Oriented Multiuser Scheduling for Wireless-Powered Internet of Things
Source: Hindawi journal article supplement (doi:10.1155/2020/7845107), 2020-01-07
Supplement: f1 [file 7845107.f1.zip › 7845107.f1/Code/SEE_search_function.m]

function [ SEE_theory1 ] = SEE_search_function( gammaBdB,dBS_input,alpha,N )
% ·ÂÕæ´ÎÊý 
% generation_number=100000;


NdBm=-30;    %N00=-174dB/Hz ÔëÉù¹¦ÂÊÆ×ÃÜ¶È   
NdBm0=10^(NdBm/10);
Pc=112.4*10^(-3);  %¹Ì¶¨ËðºÄ¹¦ÂÊ

%½ÚµãÊýÄ¿
% N=3;  % NÈ¡ 1,3,5,   Ö÷ÒªÊÇÀ´Õ¹Ê¾SEEµÄÐÔÄÜ  NÊÇÌìÏßµÄÊýÄ¿
K=3;  % KÊÇÖÐ¼ÌµÄÊýÄ¿

%»ù±¾ÊäÈë²ÎÊý
Rth=0.2;
eta=0.6;
% alpha=0.5;

%¼ÆËãÖÐ¼äÊ¹ÓÃµÄÒ»Ð©¹Ì¶¨²ÎÊý
beta=2^(2*Rth/(1-alpha));
xi=2*eta*alpha/(1-alpha);

loss=2;
dSR=3;
dRD=3;
dSE=3;
dRE=3;
dBS=abs(dBS_input);
if dBS<0.001
    dBS=0.001;
end
dBR=abs(dSR-dBS_input);
if dBR<0.001
    dBR=0.001;
end


%ÐÅµÀ²ÎÊý
lambdaSR=dSR^loss;
lambdaRD=dRD^loss;

lambdaBS=dBS^loss;
lambdaBR=dBR^loss;

lambdaSE=dSE^loss;
lambdaRE=dRE^loss;


%ÐÅÔë±ÈµÄ²ÎÊýÉèÖÃ
gammaEdB=10;
gammaEdB0=dB0(gammaEdB);
% gammaBdB=20;  %ÕâÊÇ×Ô±äÁ¿ÉèÖÃ!!!!!!!!!!!!!!!!!!!!!!!!!!!!!!!!!!!
gammaBdB0=dB0(gammaBdB);   

 


    %% Scheme1 ÀíÂÛ
    
%Scheme1
variable_temp1_1=zeros(1,N);
variable_temp1_2=zeros(1,K);

     %  SOPÀíÂÛÖµ
        for k=1:K
            for m=1:N
            variable_temp1_1(m)= ...
                          nchoosek(K,k)* nchoosek(N,m)*(-1)^(k+m) ...
                          *  4*(beta-1)*gammaBdB0*lambdaSE*lambdaRE*sqrt(m*k*lambdaBS*lambdaBR*lambdaSR*lambdaRD)...
                          /  (xi * (gammaBdB0*lambdaSE+beta*gammaEdB0*lambdaSR)*(gammaBdB0*lambdaRE+beta*gammaEdB0*lambdaRD))...
                          * besselk( 1,    2 * sqrt(  m*lambdaBR*lambdaRD*(beta-1) /(gammaBdB0*xi) ) )...
                          * besselk( 1,    2*  sqrt(  k*lambdaSR*lambdaBS*(beta-1)/(gammaBdB0*xi)  )   );
            end
                 variable_temp1_2(k)=sum(variable_temp1_1);
        end
        
        SOP_theory1=   1-sum(variable_temp1_2);
     
     %  SEEÀíÂÛÖµ
     SEE_theory1=Rth*(1-SOP_theory1)/(gammaBdB0*NdBm0+Pc);
     
