# Supplementary material for: Secure Green-Oriented Multiuser Scheduling for Wireless-Powered Internet of Things
Source: Hindawi journal article supplement (doi:10.1155/2020/7845107), 2020-01-07
Supplement: f1 [file 7845107.f1.zip › 7845107.f1/Code/SEE_simulation_function3.m]

function [SEE_simulation1]=SEE_simulation_function3(dSD,N,q)  %qÊÇdSRÕ¼µÄ±ÈÀý
% ·ÂÕæ´ÎÊý 
generation_number=100000;


NdBm=-30;    %N00=-174dB/Hz ÔëÉù¹¦ÂÊÆ×ÃÜ¶È   
NdBm0=10^(NdBm/10);
Pc=112.4*10^(-3);  %¹Ì¶¨ËðºÄ¹¦ÂÊ

%½ÚµãÊýÄ¿
% N=3;  % NÈ¡ 1,3,5,   Ö÷ÒªÊÇÀ´Õ¹Ê¾SEEµÄÐÔÄÜ  NÊÇÌìÏßµÄÊýÄ¿
K=3;  % KÊÇÐÅÔ´µÄÊýÄ¿

%»ù±¾ÊäÈë²ÎÊý
Rth=0.2;
eta=0.6;
alpha=0.5;

%¼ÆËãÖÐ¼äÊ¹ÓÃµÄÒ»Ð©¹Ì¶¨²ÎÊý
beta=2^(2*Rth/(1-alpha));
xi=2*eta*alpha/(1-alpha);

loss=2;
dSR=dSD/q;   %×¢Òâ ÕâÀï³ýµÄÏµÊý
dRD=dSD/2;
dSE=3;
dRE=3;
dBS_input=dSR/2;
dBS=abs(dBS_input);
if dBS<0.001
    dBS=0.001;
end
dBR=abs(dSR-dBS_input);
if dBR<0.001
    dBR=0.001;
end


%ÐÅµÀ²ÎÊý
lambdaSR=dSR^loss;
lambdaRD=dRD^loss;

lambdaBS=dBS^loss;
lambdaBR=dBR^loss;

lambdaSE=dSE^loss;
lambdaRE=dRE^loss;

varianceSR=1/lambdaSR;
varianceRD=1/lambdaRD;

varianceBS=1/lambdaBS;
varianceBR=1/lambdaBR;

varianceSE=1/lambdaSE;
varianceRE=1/lambdaRE;

%ÐÅÔë±ÈµÄ²ÎÊýÉèÖÃ
gammaEdB=10;
gammaEdB0=dB0(gammaEdB);
gammaBdB=20;  %ÕâÊÇ×Ô±äÁ¿ÉèÖÃ!!!!!!!!!!!!!!!!!!!!!!!!!!!!!!!!!!!
gammaBdB0=dB0(gammaBdB);   

 


 %% Scheme1 ·ÂÕæ
     
% Ô¤·ÖÅä·ÂÕæ¼ÆÊýÆ÷µÄ¿Õ¼ä
%Scheme0

%Scheme1
SOP_number1=0;  %¼ÆÊýÆ÷

% Ô¤·ÖÅä·ÂÕæÐÅµÀµÄ¿Õ¼ä
hSR1=zeros(1,generation_number);
hRD1=zeros(1,generation_number);

hBS1=zeros(1,generation_number);
hBR1=zeros(1,generation_number);

hSE1=zeros(1,generation_number);
hRE1=zeros(1,generation_number);


hSR_temp=zeros(K,generation_number);
%hRD_temp=zeros(K,generation_number);
hRD_temp=zeros(1,generation_number);

hBR_temp=zeros(N,generation_number);
hBS_temp=zeros(N,K,generation_number);

hSE_temp=zeros(K,generation_number);
hRE_temp=zeros(1,generation_number);

Beacon_number1=zeros(1,generation_number);

Source_number1=zeros(1,generation_number);

%·ÂÕæµÄÐÅµÀÊäÈë
for j=1:generation_number
    
   for m=1:K
        hSR_temp(m,j)= (  abs(   sqrt(varianceSR/2)  *  (randn+1i*randn)   )  )^2;
        hSE_temp(m,j)= (  abs(   sqrt(varianceSE/2)  *  (randn+1i*randn)   )  )^2;
   %     hRD_temp(m,j)= (  abs(   sqrt(varianceRD/2)  *  (randn+1i*randn)   )  )^2;
    %    hRE_temp(m,j)= (  abs(   sqrt(varianceRE/2)  *  (randn+1i*randn)   )  )^2;
   end

   for u=1:N
    hBR_temp(u,j)= (  abs(   sqrt(varianceBR/2)  *  (randn+1i*randn)   )  )^2;
   end
   
   for u=1:N
       for m=1:K
    hBS_temp(u,m,j)= (  abs(   sqrt(varianceBS/2)  *  (randn+1i*randn)   )  )^2;
       end
    end
       
     hRE_temp(j)= (  abs(   sqrt(varianceRE/2)  *  (randn+1i*randn)   )  )^2;
    hRD_temp(j)= (  abs(   sqrt(varianceRD/2)  *  (randn+1i*randn)   )  )^2;

    %% Scheme1  ½ÚµãµÄÑ¡Ôñ»úÖÆ
  %ÖÐ¼ÌÑ¡×î¼ÑÄÜÁ¿Õ¾
    [~,Beacon_number1(j)]=max(hBR_temp(:,j));
    %ÄÜÁ¿Õ¾Ñ¡×î¼ÑÐÅÔ´  £¡£¡£¡Çø±ðÔÚÕâÀï£¡£¡£¡
    [~,Source_number1(j)]=max(hBS_temp(Beacon_number1(j),:,j));
            
    %È·¶¨¾ßÌåµÄÑ¡ÓÃÐÅµÀ
    hSR1(j)=hSR_temp(Source_number1(j),j);
    hSE1(j)=hSE_temp(Source_number1(j),j);
    
    hRD1(j)=hRD_temp(j);
    hRE1(j)=hRE_temp(j);
    
    hBR1(j)=hBR_temp(Beacon_number1(j),j);
    hBS1(j)=hBS_temp(Beacon_number1(j),Source_number1(j),j);

    % Scheme1
            %  SOP·ÂÕæ¼ÇÊý
             if min (    ((1+gammaBdB0*xi *hBR1(j)*hRD1(j))/(1+gammaEdB0*xi*hBR1(j)*hRE1(j))) ,  ...
                    ((1+gammaBdB0*xi *hBS1(j)*hSR1(j))/(1+gammaEdB0*xi*hBS1(j)*hSE1(j)))   )<beta
            SOP_number1=SOP_number1+1;
             end        
        
end
        %  SOP·ÂÕæÖµ
        SOP_simulation1=SOP_number1/generation_number;
   
        % SEE·ÂÕæÖµ
        SEE_simulation1=Rth*(1- SOP_simulation1)/(gammaBdB0*NdBm0+Pc);
       
end
