# Supplementary material for: Secure Green-Oriented Multiuser Scheduling for Wireless-Powered Internet of Things
Source: Hindawi journal article supplement (doi:10.1155/2020/7845107), 2020-01-07
Supplement: f1 [file 7845107.f1.zip › 7845107.f1/Code/WPCCN6_SEE_gammaB.m]

clc
clear

%Scheme0  
%ÖÐ¼ÌÑ¡×î¼ÑµÄ³äµçÕ¾£¬³äµçÕ¾Ëæ»úÑ¡Ò»¸öÐÅÔ´

%Scheme1
%ÖÐ¼ÌÑ¡×î¼ÑµÄ³äµçÕ¾£¬³äµçÕ¾Ñ¡×î¼ÑÒ»¸öÐÅÔ´


% ·ÂÕæ´ÎÊý 
generation_number=100000;


NdBm=-30;    %N00=-174dB/Hz ÔëÉù¹¦ÂÊÆ×ÃÜ¶È   
NdBm0=10^(NdBm/10);
Pc=112.2*10^(-3);  %¹Ì¶¨ËðºÄ¹¦ÂÊ

%½ÚµãÊýÄ¿

N=1;    %%NÊÇÖÐ¼ÌÊýÄ¿
K=3;  % KÊÇÐÅÔ´µÄÊýÄ¿
%K=5;
%K=1

%»ù±¾ÊäÈë²ÎÊý
Rth=0.2;
eta=0.6;
alpha=0.5;

%¼ÆËãÖÐ¼äÊ¹ÓÃµÄÒ»Ð©¹Ì¶¨²ÎÊý
beta=2^(2*Rth/(1-alpha));
xi=2*eta*alpha/(1-alpha);


loss=2;
dSR=3;
dRD=3;
dSE=3;
dRE=3;
dBS=dSR/2;
dBR=dSR-dBS;


%ÐÅµÀ²ÎÊý
lambdaSR=dSR^loss;
lambdaRD=dRD^loss;

lambdaBS=dBS^loss;
lambdaBR=dBR^loss;

lambdaSE=dSE^loss;
lambdaRE=dRE^loss;

varianceSR=1/lambdaSR;
varianceRD=1/lambdaRD;

varianceBS=1/lambdaBS;
varianceBR=1/lambdaBR;

varianceSE=1/lambdaSE;
varianceRE=1/lambdaRE;

%ÐÅÔë±ÈµÄ²ÎÊýÉèÖÃ
gammaEdB=10;
gammaEdB0=dB0(gammaEdB);
gammaBdB=5:1:45;  %ÕâÊÇ×Ô±äÁ¿ÉèÖÃ!!!!!!!!!!!!!!!!!!!!!!!!!!!!!!!!!!!


gammathdB=15;    %ÄÜÁ¿µÄÃÅÏÞÏòÁ¿
gammathdB0=dB0(gammathdB);

%% ×Ô±äÁ¿·ÖÅä¼ÆËã¿Õ¼ä
gammaBdB0=zeros(1,length(gammaBdB));
fai=zeros(1,length(gammaBdB));

%% ÀíÂÛÖµÔ¤·ÖÅä¿Õ¼ä
SOP_theory0=zeros(1,length(gammaBdB));
EOP_theory0=zeros(1,length(gammaBdB));
Pout_theory0=zeros(1,length(gammaBdB));
SEE_theory0=zeros(1,length(gammaBdB));
%Scheme1
SOP_theory1=zeros(1,length(gammaBdB));
EOP_theory1=zeros(1,length(gammaBdB));
Pout_theory1=zeros(1,length(gammaBdB));
SEE_theory1=zeros(1,length(gammaBdB));
%Scheme2
SOP_theory2=zeros(1,length(gammaBdB));
EOP_theory2=zeros(1,length(gammaBdB));
Pout_theory2=zeros(1,length(gammaBdB));
SEE_theory2=zeros(1,length(gammaBdB));
%Scheme3
SOP_theory3=zeros(1,length(gammaBdB));
EOP_theory3=zeros(1,length(gammaBdB));
Pout_theory3=zeros(1,length(gammaBdB));
SEE_theory3=zeros(1,length(gammaBdB));


%Scheme0
variable_temp0_1=zeros(1,N);
variable_temp0_2=zeros(1,K);
%Scheme1
variable_temp1_1=zeros(1,N);
variable_temp1_2=zeros(1,K);
%Scheme2
variable_temp2_1=zeros(1,N);
variable_temp2_2=zeros(1,K);
%Scheme3
variable_temp3_1=zeros(1,N);
variable_temp3_2=zeros(1,K);


%% ·ÂÕæÖµÔ¤·ÖÅä¿Õ¼ä
% Ô¤·ÖÅä±äÁ¿µÄ¿Õ¼ä
%Scheme0
SOP_simulation0=zeros(1,length(gammaBdB));  
EOP_simulation0=zeros(1,length(gammaBdB));  
Pout_simulation0=zeros(1,length(gammaBdB));
SEE_simulation0=zeros(1,length(gammaBdB));
%Scheme1
SOP_simulation1=zeros(1,length(gammaBdB));  
EOP_simulation1=zeros(1,length(gammaBdB));  
Pout_simulation1=zeros(1,length(gammaBdB));
SEE_simulation1=zeros(1,length(gammaBdB));
%Scheme2
SOP_simulation2=zeros(1,length(gammaBdB));  
EOP_simulation2=zeros(1,length(gammaBdB));  
Pout_simulation2=zeros(1,length(gammaBdB));
SEE_simulation2=zeros(1,length(gammaBdB));
%Scheme3
SOP_simulation3=zeros(1,length(gammaBdB));  
EOP_simulation3=zeros(1,length(gammaBdB));  
Pout_simulation3=zeros(1,length(gammaBdB));
SEE_simulation3=zeros(1,length(gammaBdB));


% Ô¤·ÖÅä·ÂÕæ¼ÆÊýÆ÷µÄ¿Õ¼ä
%Scheme0
SOP_number0=zeros(1,length(gammaBdB));  %¼ÆÊýÆ÷
EOP_number0=zeros(1,length(gammaBdB));
%Scheme1
SOP_number1=zeros(1,length(gammaBdB));  %¼ÆÊýÆ÷
EOP_number1=zeros(1,length(gammaBdB));
%Scheme2
SOP_number2=zeros(1,length(gammaBdB));  %¼ÆÊýÆ÷
EOP_number2=zeros(1,length(gammaBdB));
%Scheme3
SOP_number3=zeros(1,length(gammaBdB));  %¼ÆÊýÆ÷
EOP_number3=zeros(1,length(gammaBdB));

% Ô¤·ÖÅä·ÂÕæÐÅµÀµÄ¿Õ¼ä
hSR0=zeros(1,generation_number);
hRD0=zeros(1,generation_number);
hSR1=zeros(1,generation_number);
hRD1=zeros(1,generation_number);
hSR2=zeros(1,generation_number);
hRD2=zeros(1,generation_number);
hSR3=zeros(1,generation_number);
hRD3=zeros(1,generation_number);


hBS0=zeros(1,generation_number);
hBR0=zeros(1,generation_number);
hBS1=zeros(1,generation_number);
hBR1=zeros(1,generation_number);
hBS2=zeros(1,generation_number);
hBR2=zeros(1,generation_number);
hBS3=zeros(1,generation_number);
hBR3=zeros(1,generation_number);

hSE0=zeros(1,generation_number);
hRE0=zeros(1,generation_number);
hSE1=zeros(1,generation_number);
hRE1=zeros(1,generation_number);
hSE2=zeros(1,generation_number);
hRE2=zeros(1,generation_number);
hSE3=zeros(1,generation_number);
hRE3=zeros(1,generation_number);

hSR_temp=zeros(K,generation_number);
%hRD_temp=zeros(K,generation_number);
hRD_temp=zeros(1,generation_number);

hBR_temp=zeros(N,generation_number);
hBS_temp=zeros(N,K,generation_number);

hSE_temp=zeros(K,generation_number);
hRE_temp=zeros(1,generation_number);

Beacon_number0=zeros(1,generation_number);
Beacon_number1=zeros(1,generation_number);
Beacon_number2=zeros(1,generation_number);
Beacon_number3=zeros(1,generation_number);


Source_number0=zeros(1,generation_number);
Source_number1=zeros(1,generation_number);
Source_number2=zeros(1,generation_number);


%·ÂÕæµÄÐÅµÀÊäÈë
for j=1:generation_number
    
   for m=1:K
       hSR_temp(m,j)= (  abs(   sqrt(varianceSR/2)  *  (randn+1i*randn)   )  )^2;
        hSE_temp(m,j)= (  abs(   sqrt(varianceRD/2)  *  (randn+1i*randn)   )  )^2;
   %     hRD_temp(m,j)= (  abs(   sqrt(varianceRD/2)  *  (randn+1i*randn)   )  )^2;
    %    hRE_temp(m,j)= (  abs(   sqrt(varianceRE/2)  *  (randn+1i*randn)   )  )^2;
   end

   for u=1:N
    hBR_temp(u,j)= (  abs(   sqrt(varianceBR/2)  *  (randn+1i*randn)   )  )^2;
   end
   
   for u=1:N
       for m=1:K
    hBS_temp(u,m,j)= (  abs(   sqrt(varianceBS/2)  *  (randn+1i*randn)   )  )^2;
       end
    end
       
     hRE_temp(j)= (  abs(   sqrt(varianceRE/2)  *  (randn+1i*randn)   )  )^2;
    hRD_temp(j)= (  abs(   sqrt(varianceRD/2)  *  (randn+1i*randn)   )  )^2;

    %% Scheme0  ½ÚµãµÄÑ¡Ôñ»úÖÆ
   %ÖÐ¼ÌÑ¡×î¼ÑÄÜÁ¿Õ¾
    [~,Beacon_number0(j)]=max(hBR_temp(:,j));
    %Ëæ»úÑ¡Ò»¸öÐÅÔ´   
    %Relay_series=1:1:K;
    Source_series=1:1:K;
    Source_number0(j)=Source_series(randi(length(Source_series),1,1));
    
    %È·¶¨¾ßÌåµÄÑ¡ÓÃÐÅµÀ
    hSR0(j)=hSR_temp(Source_number0(j),j);
    hSE0(j)=hSE_temp(Source_number0(j),j);   
    
    hRD0(j)=hRD_temp(j);
    hRE0(j)=hRE_temp(j);
    
    hBR0(j)=hBR_temp(Beacon_number0(j),j);
    hBS0(j)=hBS_temp(Beacon_number0(j),Source_number0(j),j);
     %% Scheme1  ½ÚµãµÄÑ¡Ôñ»úÖÆ
   %ÖÐ¼ÌÑ¡×î¼ÑÄÜÁ¿Õ¾
    [~,Beacon_number1(j)]=max(hBR_temp(:,j));
    %ÖÐ¼ÌÑ¡×î¼ÑÐÅÔ´
    [~,Source_number1(j)]=max(hSR_temp(:,j));
    
    %È·¶¨¾ßÌåµÄÑ¡ÓÃÐÅµÀ
    hSR1(j)=hSR_temp(Source_number1(j),j);
    hSE1(j)=hSE_temp(Source_number1(j),j);
    
    hRD1(j)=hRD_temp(j);
    hRE1(j)=hRE_temp(j);
    
    hBR1(j)=hBR_temp(Beacon_number1(j),j);
    hBS1(j)=hBS_temp(Beacon_number1(j),Source_number1(j),j);
    %% Scheme2  ½ÚµãµÄÑ¡Ôñ»úÖÆ
    %ÖÐ¼ÌÑ¡×î¼ÑÄÜÁ¿Õ¾
    [~,Beacon_number2(j)]=max(hBR_temp(:,j));
    %ÄÜÁ¿Õ¾Ñ¡×î¼ÑÐÅÔ´  £¡£¡£¡Çø±ðÔÚÕâÀï£¡£¡£¡
    [~,Source_number2(j)]=max(hBS_temp(Beacon_number2(j),:,j));
            
    %È·¶¨¾ßÌåµÄÑ¡ÓÃÐÅµÀ
    hSR2(j)=hSR_temp(Source_number2(j),j);
    hSE2(j)=hSE_temp(Source_number2(j),j);
    
    hRD2(j)=hRD_temp(j);
    hRE2(j)=hRE_temp(j);
    
    hBR2(j)=hBR_temp(Beacon_number2(j),j);
    hBS2(j)=hBS_temp(Beacon_number2(j),Source_number2(j),j);

end


%Ö÷º¯Êý
for i=1:length(gammaBdB)

    gammaBdB0(i)=dB0(gammaBdB(i));   
    fai(i)= (1-alpha)*gammathdB0/(2*alpha*eta*gammaBdB0(i));    %   ÃÅÏÞ²ÎÊý       
     
    
     %% Scheme0 ÀíÂÛÖµ
      %  SOPÀíÂÛÖµ
        for m=1:N
            variable_temp0_1(m)=...
                          nchoosek(N,m)*(-1)^(m+1) ...
                          *  4*(beta-1)*gammaBdB0(i)*lambdaSE*lambdaRE*sqrt(m*lambdaBS*lambdaBR*lambdaSR*lambdaRD)...
                          /  (xi * (gammaBdB0(i)*lambdaSE+beta*gammaEdB0*lambdaSR)*(gammaBdB0(i)*lambdaRE+beta*gammaEdB0*lambdaRD))...
                          * besselk( 1,    2 * sqrt(  m*lambdaBR*lambdaRD*(beta-1) /(gammaBdB0(i)*xi) ) )...
                          * besselk( 1,    2*  sqrt(  lambdaSR*lambdaBS*(beta-1)/(gammaBdB0(i)*xi)  )   );
        end
        
        SOP_theory0(i)=   1-sum(variable_temp0_1);
        
   %  EOPÀíÂÛÖµ
        EOP_theory0(i)= 1-   ( 1- (1-exp(-lambdaBR*fai(i)))^N  ) *   exp(-lambdaBS*fai(i));
     %  PoutÀíÂÛÖµ
     Pout_theory0(i)=EOP_theory0(i)+(1-EOP_theory0(i))*SOP_theory0(i);    
          
     %  SEEÀíÂÛÖµ
     SEE_theory0(i)=Rth*(1- SOP_theory0(i))/(gammaBdB0(i)*NdBm0+Pc);
     
    %% Scheme1 ÀíÂÛÖµ
     %  SOPÀíÂÛÖµ
        for k=1:K
            for m=1:N
            variable_temp1_1(m)= ...
                          nchoosek(K,k)* nchoosek(N,m)*(-1)^(k+m) ...
                          *  4*(beta-1)*gammaBdB0(i)*lambdaSE*lambdaRE*sqrt(m*k*lambdaBS*lambdaBR*lambdaSR*lambdaRD)...
                          /  (xi * (gammaBdB0(i)*lambdaSE+k*beta*gammaEdB0*lambdaSR)*(gammaBdB0(i)*lambdaRE+beta*gammaEdB0*lambdaRD))...
                          * besselk( 1,    2 * sqrt(  m*lambdaBR*lambdaRD*(beta-1) /(gammaBdB0(i)*xi) ) )...
                          * besselk( 1,    2*  sqrt(  k*lambdaSR*lambdaBS*(beta-1)/(gammaBdB0(i)*xi)  )   );
            end
                 variable_temp1_2(k)=sum(variable_temp1_1);
        end
        
        SOP_theory1(i)=   1-sum(variable_temp1_2);
        
     %  EOPÀíÂÛÖµ
        EOP_theory1(i)= 1-   ( 1- (1-exp(-lambdaBR*fai(i)))^N  ) *   exp(-lambdaBS*fai(i));
        
     %  PoutÀíÂÛÖµ
     Pout_theory1(i)=EOP_theory1(i)+(1-EOP_theory1(i))*SOP_theory1(i);  
     
     
     %  SEEÀíÂÛÖµ
     SEE_theory1(i)=Rth*(1-SOP_theory1(i))/(gammaBdB0(i)*NdBm0+Pc);

     %% Scheme2 ÀíÂÛÖµ
     %  SOPÀíÂÛÖµ
        for k=1:K
            for m=1:N
          variable_temp2_1(m)= ...
                          nchoosek(K,k)* nchoosek(N,m)*(-1)^(k+m) ...
                          *  4*(beta-1)*gammaBdB0(i)*lambdaSE*lambdaRE*sqrt(m*k*lambdaBS*lambdaBR*lambdaSR*lambdaRD)...
                          /  (xi * (gammaBdB0(i)*lambdaSE+beta*gammaEdB0*lambdaSR)*(gammaBdB0(i)*lambdaRE+beta*gammaEdB0*lambdaRD))...
                          * besselk( 1,    2 * sqrt(  k*lambdaBR*lambdaRD*(beta-1) /(gammaBdB0(i)*xi) ) )...
                          * besselk( 1,    2*  sqrt(  m*lambdaSR*lambdaBS*(beta-1)/(gammaBdB0(i)*xi)  )   );
            end
                 variable_temp2_2(k)=sum(variable_temp2_1);
        end
        
        SOP_theory2(i)=   1-sum(variable_temp2_2);


     %  EOPÀíÂÛÖµ
        EOP_theory2(i)= 1-   ( 1- (1-exp(-lambdaBS*fai(i)))^N  ) *   ( 1- (1-exp(-lambdaBR*fai(i)))^K  );
        
     %  PoutÀíÂÛÖµ
     Pout_theory2(i)=EOP_theory2(i)+(1-EOP_theory2(i))*SOP_theory2(i);
     
     %  SEEÀíÂÛÖµ
     SEE_theory2(i)=Rth*(1-SOP_theory2(i))/(gammaBdB0(i)*NdBm0+Pc);  
     
     
   %% ·ÂÕæÖµ
        
    for j=1:generation_number
             
             % Scheme0
             %  SOP·ÂÕæ¼ÇÊý
             if min (    ((1+gammaBdB0(i)*xi *hBR0(j)*hRD0(j))/(1+gammaEdB0*xi*hBR0(j)*hRE0(j))) ,  ...
                    ((1+gammaBdB0(i)*xi *hBS0(j)*hSR0(j))/(1+gammaEdB0*xi*hBS0(j)*hSE0(j)))   )<beta
            SOP_number0(i)=SOP_number0(i)+1;
             end        
                 %  EOP·ÂÕæ¼ÇÊý    
            if  min ( hBS0(j),hBR0(j) )<fai(i)
                 EOP_number0(i)=EOP_number0(i)+1;
            end
            
            
            % Scheme1
            %  SOP·ÂÕæ¼ÇÊý
             if min (    ((1+gammaBdB0(i)*xi *hBR1(j)*hRD1(j))/(1+gammaEdB0*xi*hBR1(j)*hRE1(j))) ,  ...
                    ((1+gammaBdB0(i)*xi *hBS1(j)*hSR1(j))/(1+gammaEdB0*xi*hBS1(j)*hSE1(j)))   )<beta
            SOP_number1(i)=SOP_number1(i)+1;
             end        
                %  EOP·ÂÕæ¼ÇÊý    
            if  min ( hBS1(j),hBR1(j) )<fai(i)
                 EOP_number1(i)=EOP_number1(i)+1;
            end
            
            
                  % Scheme2
             %  SOP·ÂÕæ¼ÇÊý
             if min (    ((1+gammaBdB0(i)*xi *hBR2(j)*hRD2(j))/(1+gammaEdB0*xi*hBR2(j)*hRE2(j))) ,  ...
                    ((1+gammaBdB0(i)*xi *hBS2(j)*hSR2(j))/(1+gammaEdB0*xi*hBS2(j)*hSE2(j)))   )<beta
            SOP_number2(i)=SOP_number2(i)+1;
             end        
        
            %  EOP·ÂÕæ¼ÇÊý    
            if  min ( hBS2(j),hBR2(j) )<fai(i)
                 EOP_number2(i)=EOP_number2(i)+1;
            end
            
    end   
    
    
        %  SOP·ÂÕæÖµ
        SOP_simulation0(i)=SOP_number0(i)/generation_number;
        SOP_simulation1(i)=SOP_number1(i)/generation_number;
        SOP_simulation2(i)=SOP_number2(i)/generation_number;
   
         %  EOP·ÂÕæÖµ
        EOP_simulation0(i)=EOP_number0(i)/generation_number;
        EOP_simulation1(i)=EOP_number1(i)/generation_number;
        EOP_simulation2(i)=EOP_number2(i)/generation_number;
        %EOP_simulation3(i)=EOP_number3(i)/generation_number;
        % Pout·ÂÕæÖµ
        Pout_simulation0(i)=EOP_simulation0(i)+(1-EOP_simulation0(i))*SOP_simulation0(i);
        Pout_simulation1(i)=EOP_simulation1(i)+(1-EOP_simulation1(i))*SOP_simulation1(i);
        Pout_simulation2(i)=EOP_simulation2(i)+(1-EOP_simulation2(i))*SOP_simulation2(i);
        
        % SEE·ÂÕæÖµ
      %  SEE_simulation0(i)=Rth*(1- SOP_simulation0(i))/(gammaBdB0(i)*NdBm0+Pc);
       % SEE_simulation1(i)=Rth*(1- SOP_simulation1(i))/(gammaBdB0(i)*NdBm0+Pc);
        
        SEE_simulation0(i)=Rth*(1- SOP_simulation0(i))/(gammaBdB0(i)*NdBm0+Pc);
        SEE_simulation1(i)=Rth*(1- SOP_simulation1(i))/(gammaBdB0(i)*NdBm0+Pc);
        SEE_simulation2(i)=Rth*(1- SOP_simulation2(i))/(gammaBdB0(i)*NdBm0+Pc);
        

end


plot(gammaBdB,SEE_theory0,'--b','LineWidth',2);
%plot(gammaBdB,SOP_theory0,'--b','LineWidth',2);
hold on
%plot(gammaBdB,SEE_theory1,'-r','LineWidth',2);
plot(gammaBdB,SEE_theory2,'--b','LineWidth',2);
%plot(gammaBdB,SOP_theory2,'--b','LineWidth',2);

plot(gammaBdB,SEE_simulation0,'ok','LineWidth',2);
%plot(gammaBdB,SOP_simulation0,'ok','LineWidth',2);
hold on
%plot(gammaBdB,SEE_simulation1,'^k','LineWidth',2);
plot(gammaBdB,SEE_simulation2,'^k','LineWidth',2);
%plot(gammaBdB,SOP_simulation2,'^k','LineWidth',2);

grid on
xlabel('\gamma_B (dB)')
 ylabel('SEE')

  legend('Theory Scheme1','Theory Scheme2','Simulation Scheme1','Simulation Scheme2');
