# Supplementary figures and images for: Secure Green-Oriented Multiuser Scheduling for Wireless-Powered Internet of Things
Source: Hindawi journal article supplement (doi:10.1155/2020/7845107), 2020-01-07

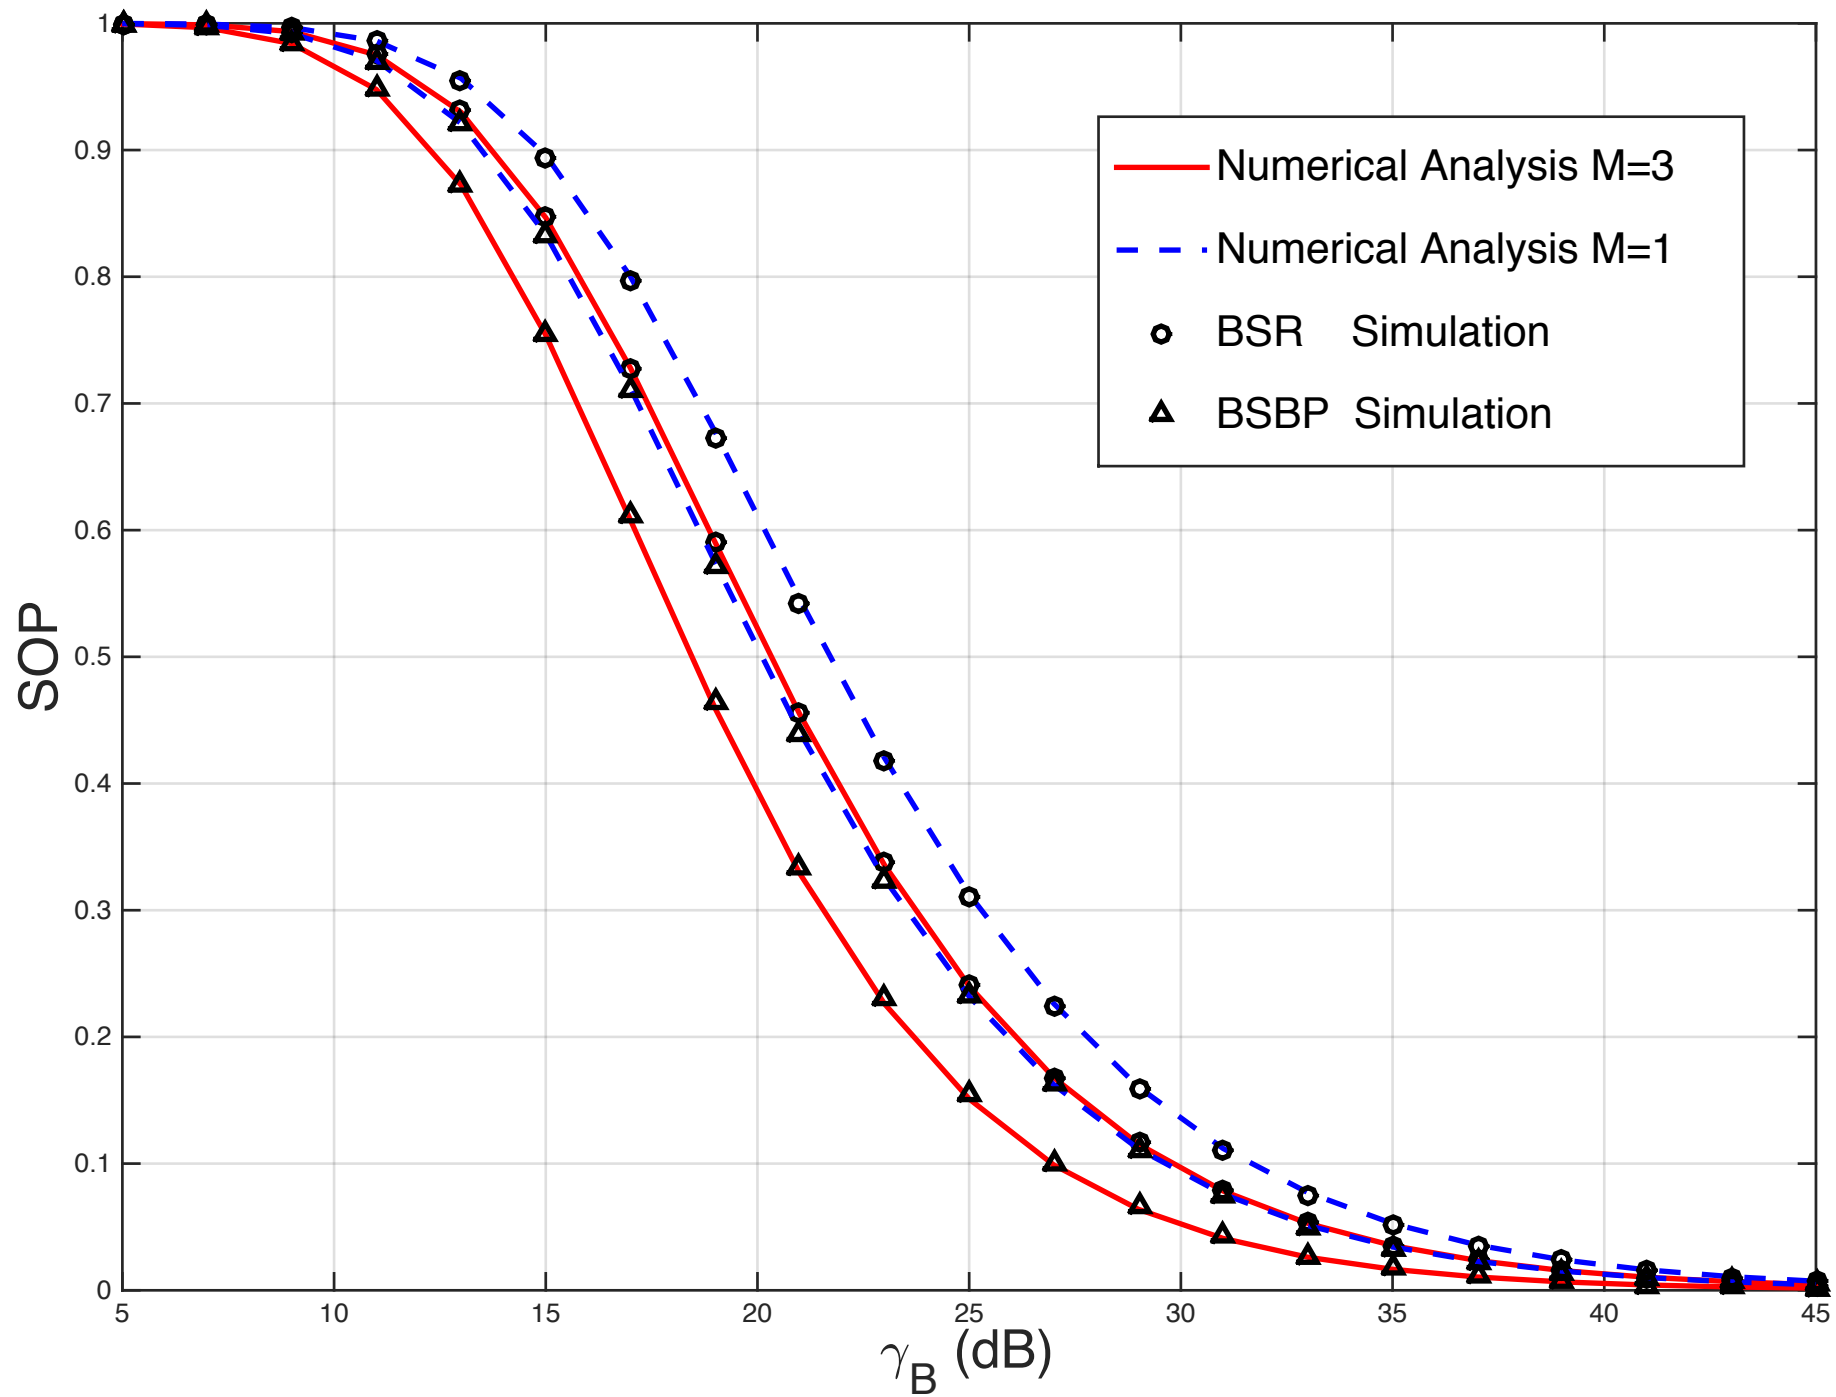

Supplement: f1 [file 7845107.f1.zip › 7845107.f1/Additional material/Fig0_SOP_gammaB.pdf]

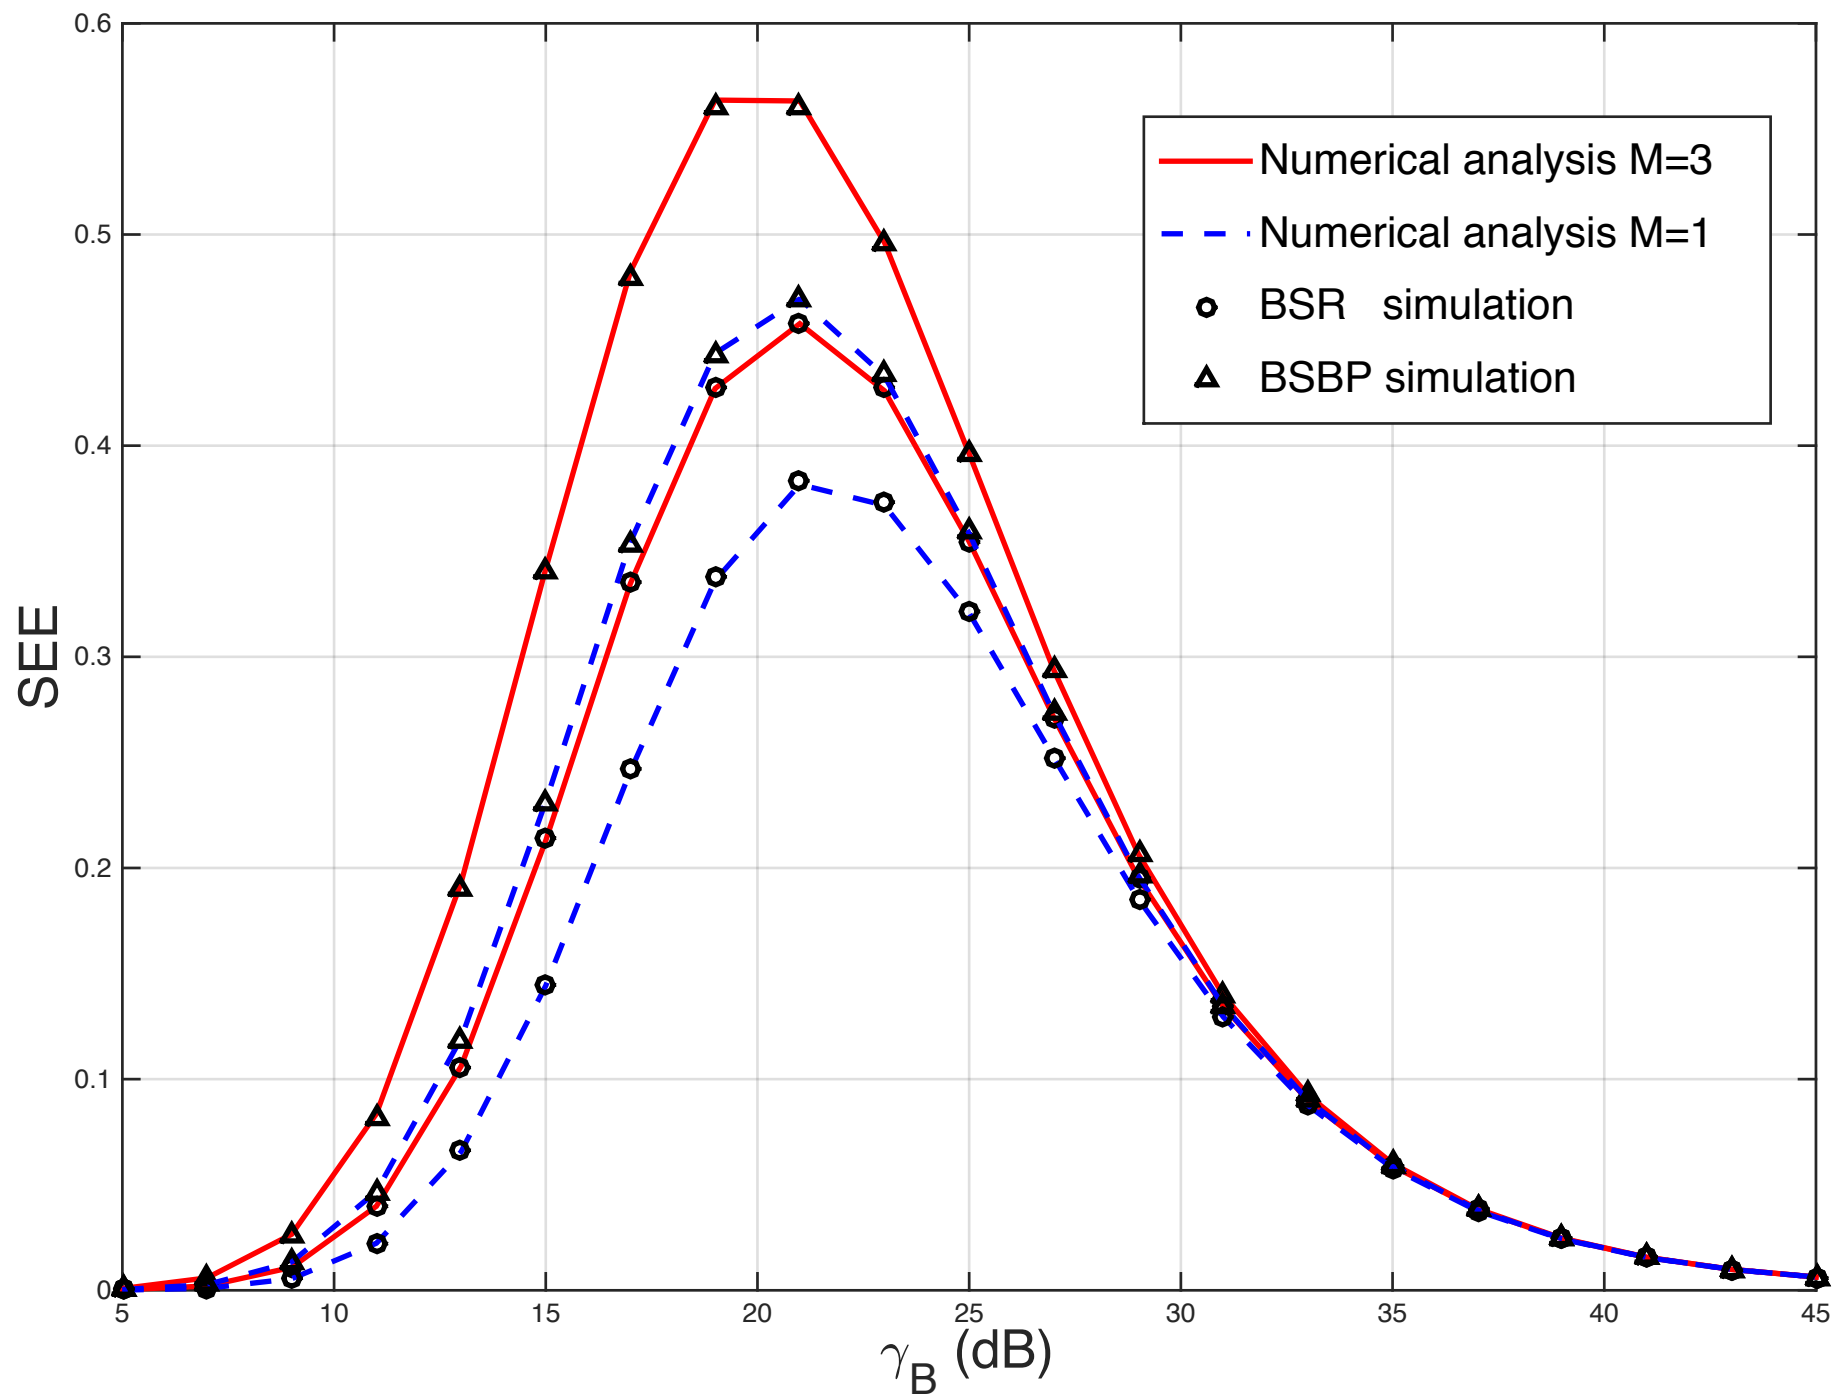

Supplement: f1 [file 7845107.f1.zip › 7845107.f1/Additional material/Fig1_SEE_gammaB.pdf]

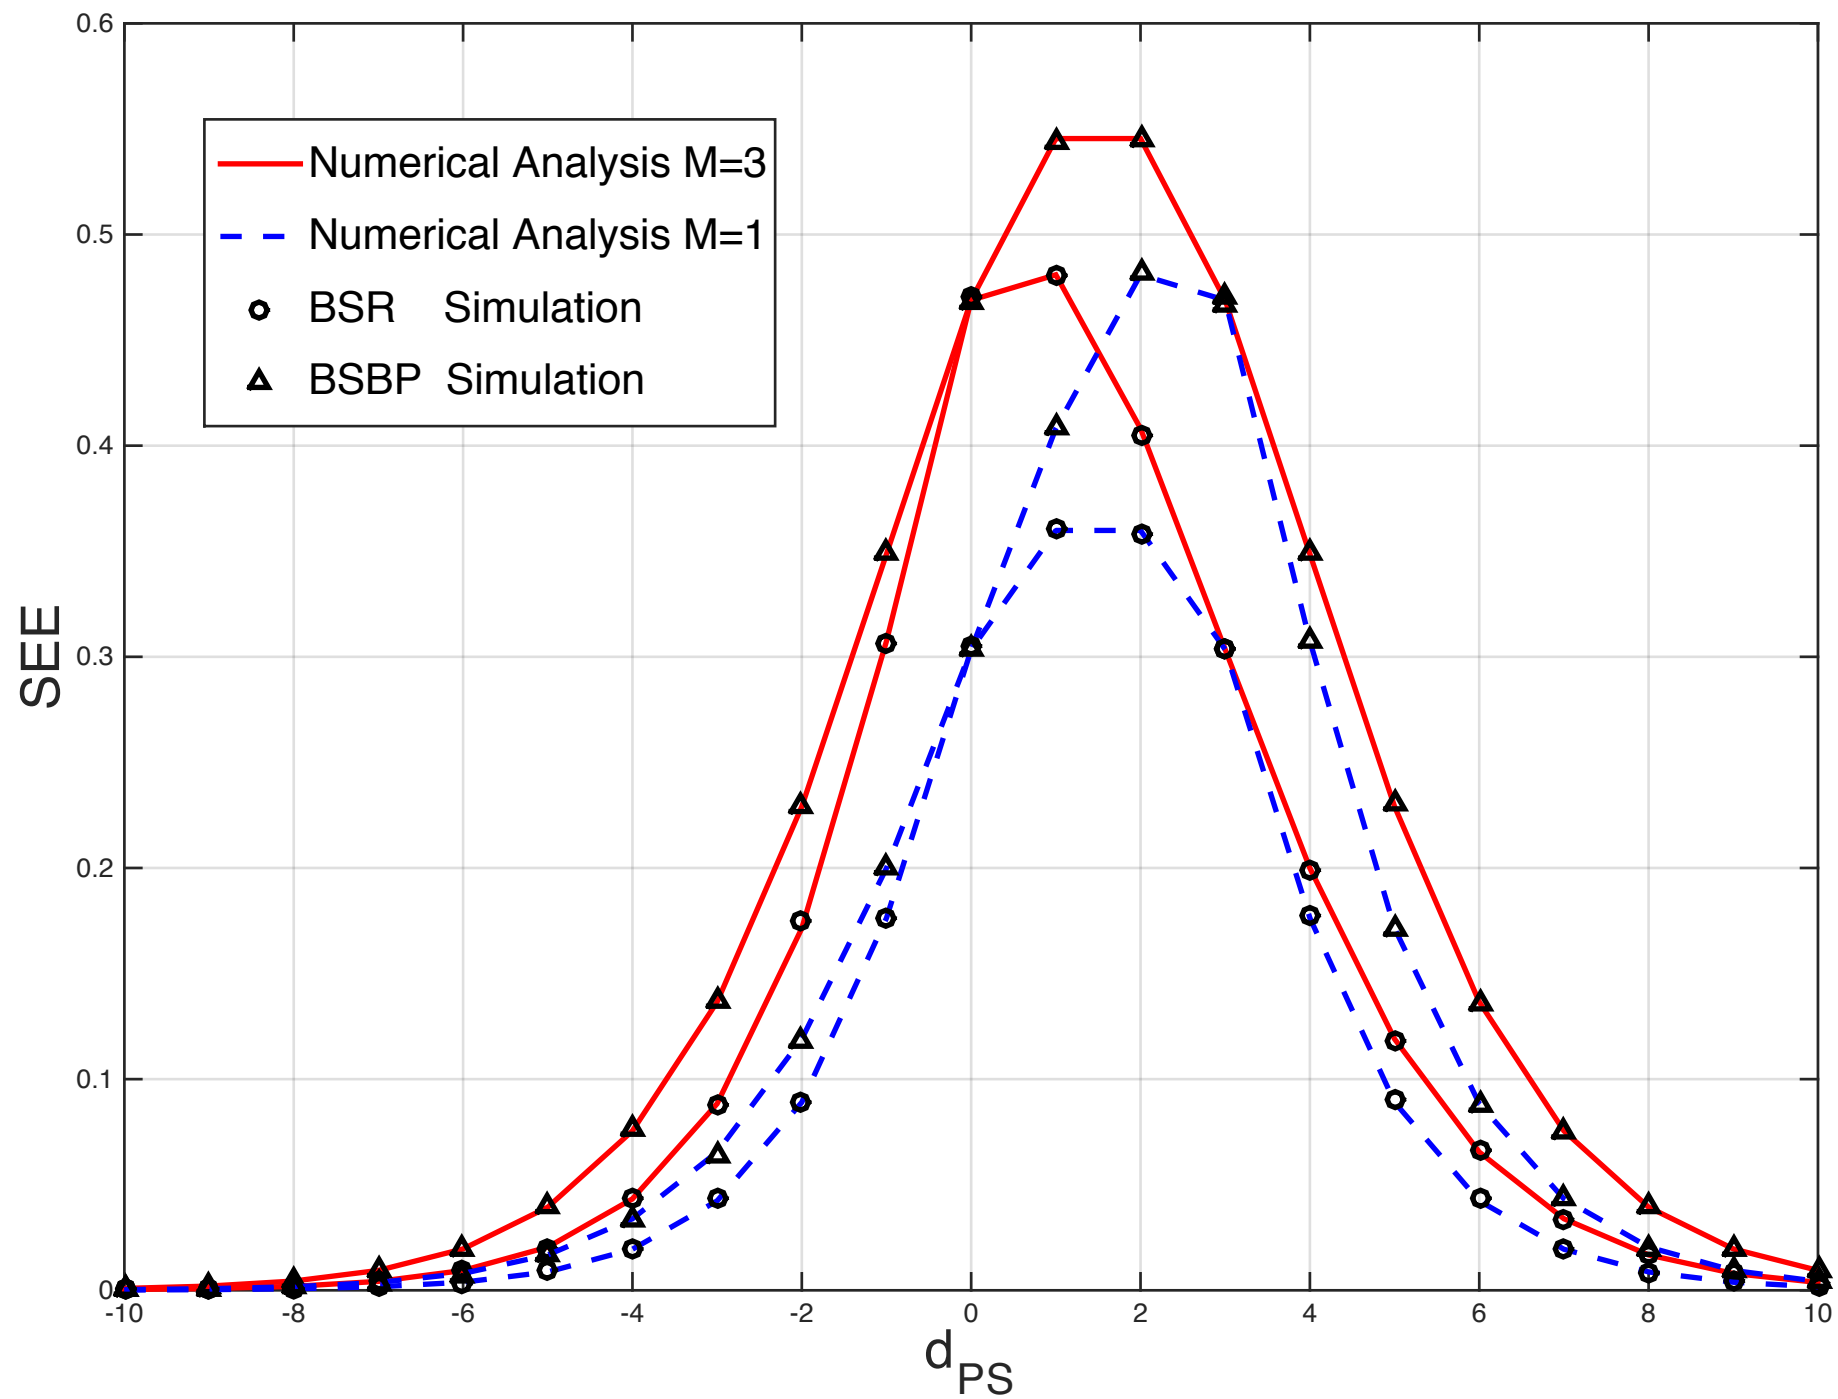

Supplement: f1 [file 7845107.f1.zip › 7845107.f1/Additional material/Fig2_SEE_dBS.pdf]

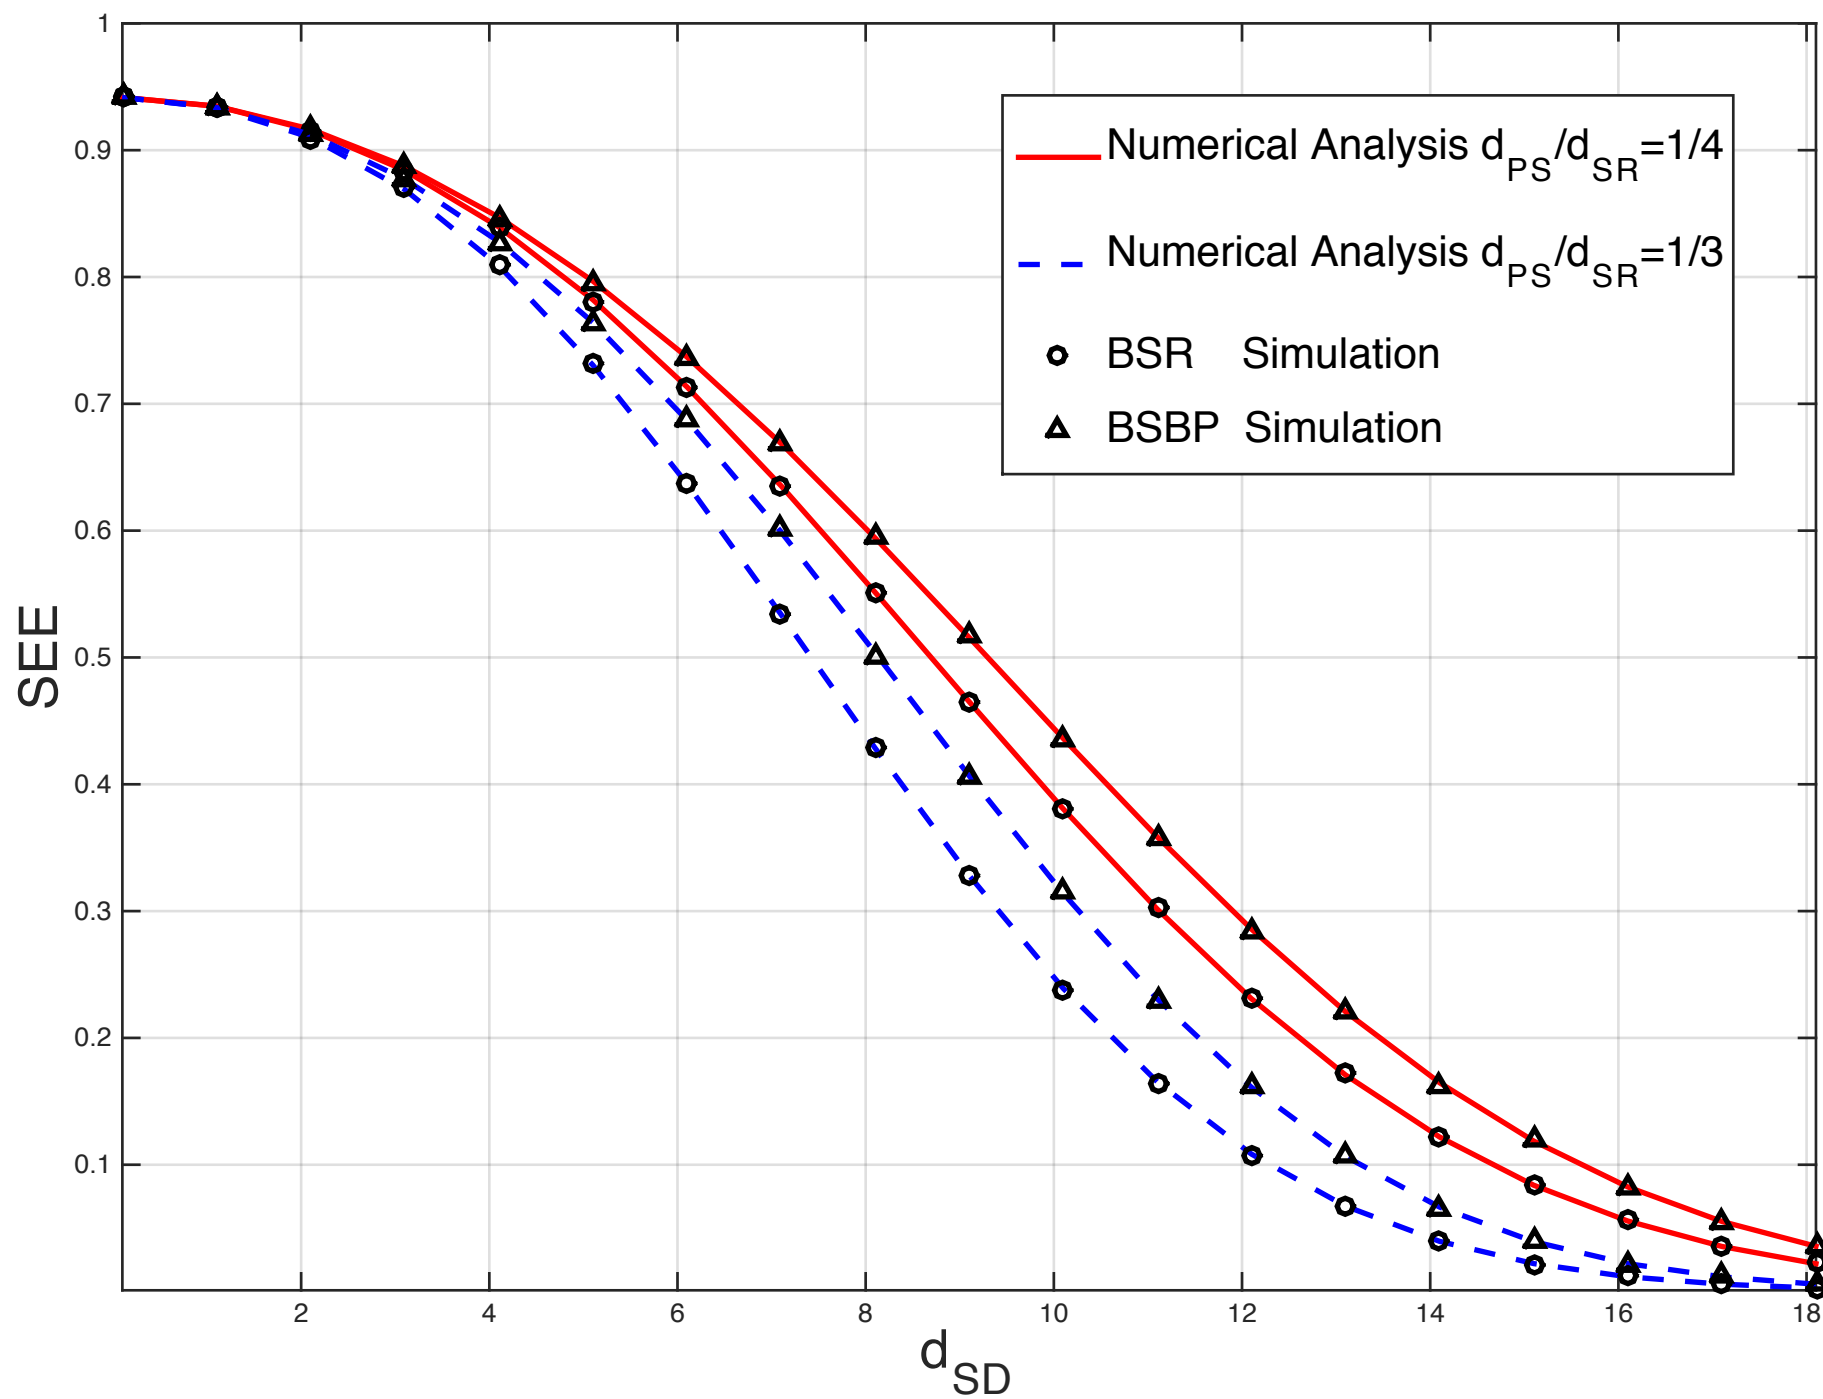

Supplement: f1 [file 7845107.f1.zip › 7845107.f1/Additional material/Fig3_SEE_dSD.pdf]

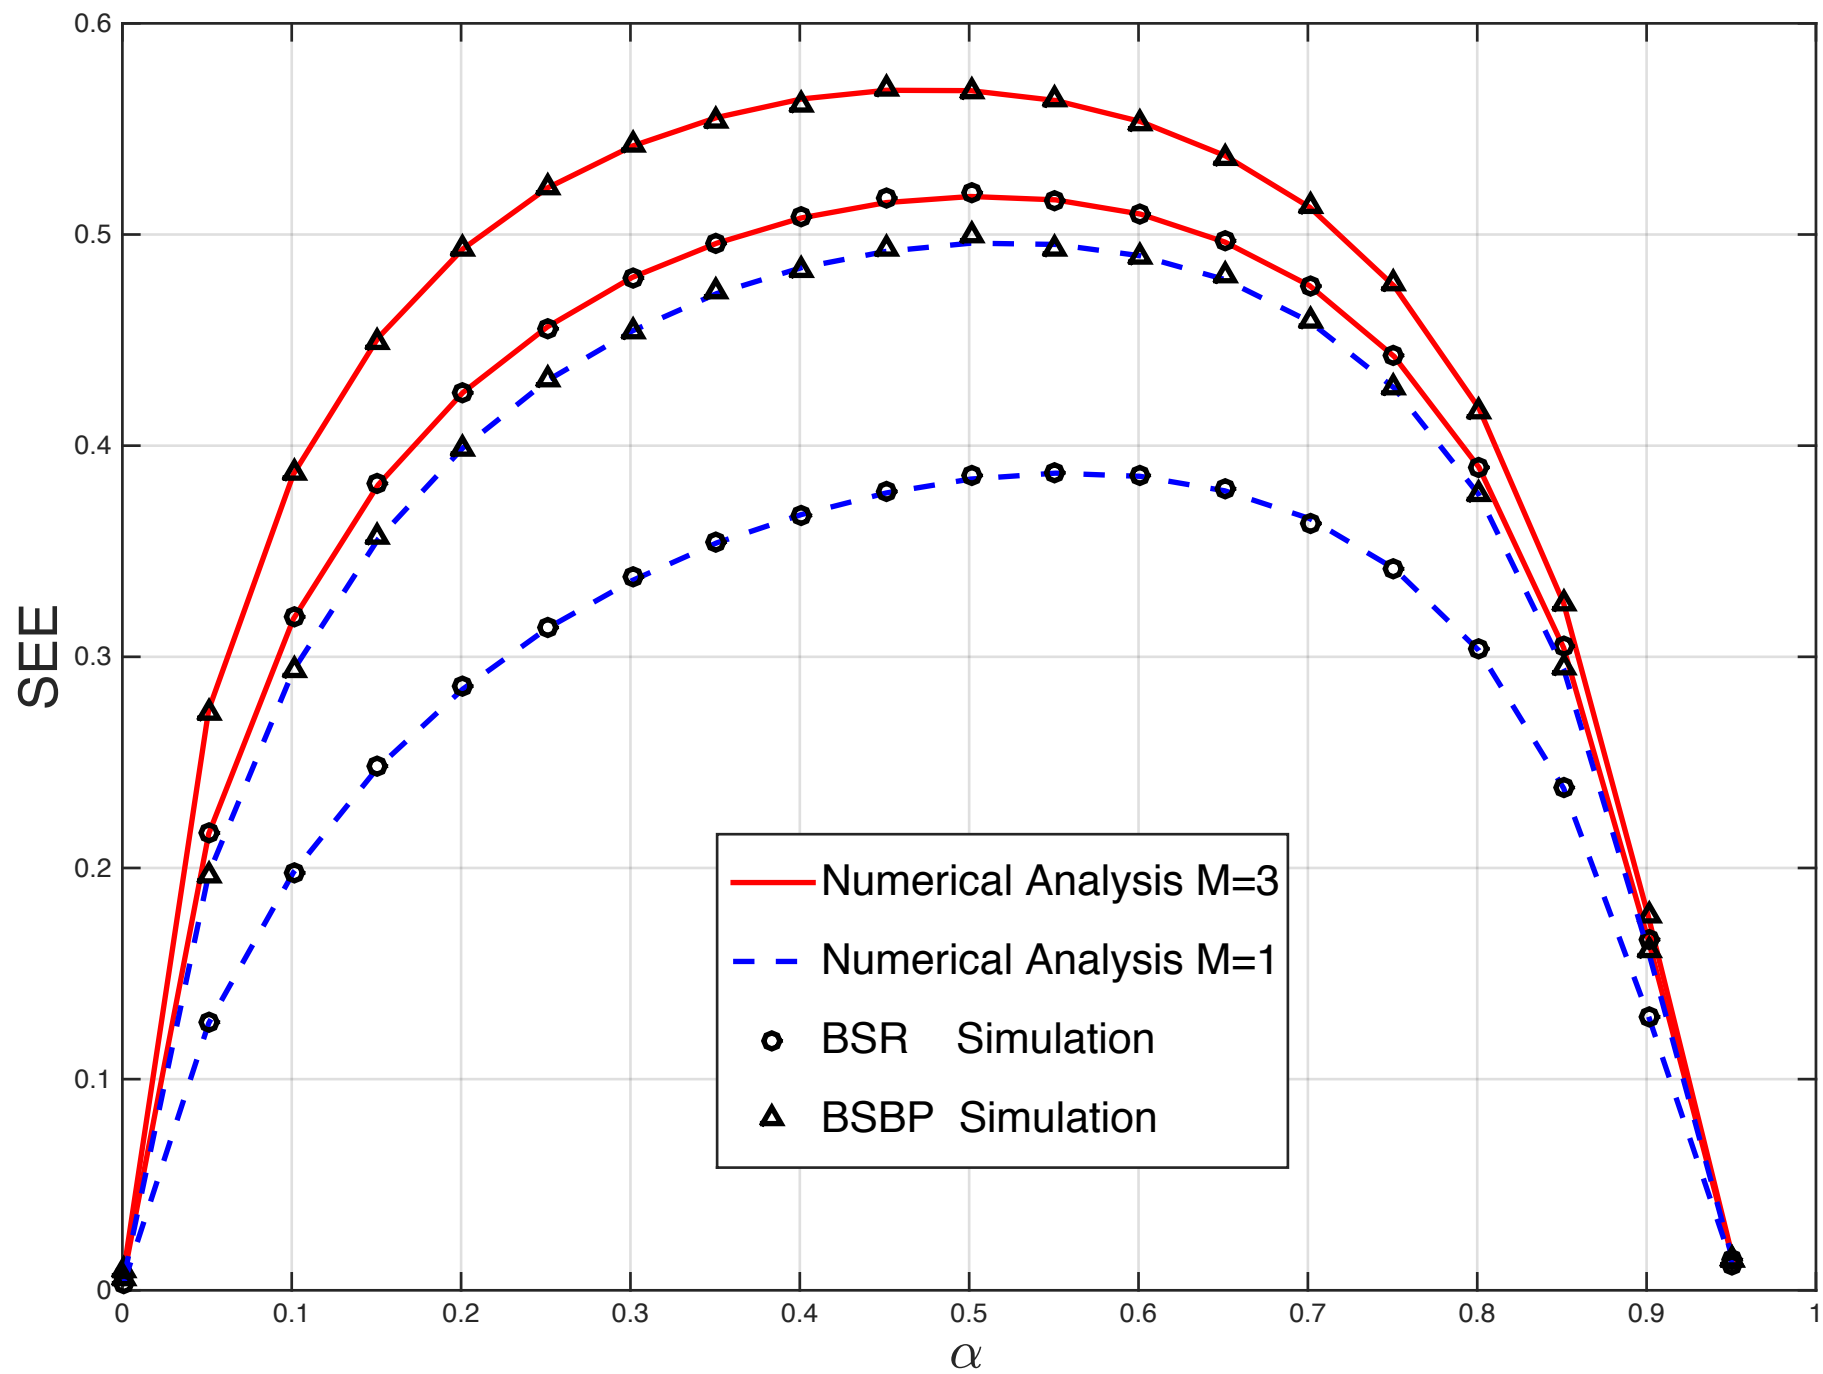

Supplement: f1 [file 7845107.f1.zip › 7845107.f1/Additional material/Fig4_SEE_alpha.pdf]
